# Supplementary material
Source: publisher figshare collection journal article supplement (https://sage.figshare.com/ndownloader/files/20366946)
Supplement: Supplementary file 1 [file 20366946]

Archive with 687 entries (687 files):
- [Content_Types].xml
- _rels/.rels
- docProps/thumbnail.jpeg
- docProps/core.xml
- FixedDocSeq.fdseq
- Resources/Images/image_391.png
- Resources/Images/image_392.jpg
- Documents/1/Pages/65.fpage
- Resources/Images/image_388.jpg
- Resources/Images/image_389.jpg
- Resources/Images/image_393.jpg
- Documents/1/Pages/64.fpage
- Resources/Images/image_387.jpg
- Resources/Images/image_390.png
- Documents/1/Pages/66.fpage
- Resources/Images/image_395.jpg
- Resources/Images/image_400.jpg
- Documents/1/Pages/67.fpage
- Resources/Images/image_399.jpg
- Resources/Images/image_398.jpg
- Resources/Images/image_397.jpg
- Resources/Images/image_396.jpg
- Resources/Images/image_386.png
- Resources/Images/image_394.png
- Resources/Images/image_383.png
- Resources/Images/image_384.jpg
- Resources/Images/image_375.jpg
- Resources/Images/image_374.png
- Resources/Images/image_373.jpg
- Resources/Images/image_372.jpg
- Resources/Images/image_371.jpg
- Resources/Images/image_370.jpg
- Documents/1/Pages/61.fpage
- Resources/Images/image_369.png
- Resources/Images/image_376.png
- Documents/1/Pages/62.fpage
- Resources/Images/image_377.jpg
- Resources/Images/image_401.jpg
- Resources/Images/image_382.png
- Resources/Images/image_381.jpg
- Documents/1/Pages/63.fpage
- Resources/Images/image_380.jpg
- Resources/Images/image_379.jpg
- Resources/Images/image_378.jpg
- Resources/Images/image_385.jpg
- Resources/Images/image_403.png
- Resources/Images/image_368.png
- Resources/Images/image_427.jpg
- Resources/Images/image_426.jpg
- Resources/Images/image_425.png
- Resources/Images/image_424.png
- Resources/Images/image_423.jpg
- Documents/1/Pages/72.fpage
- Resources/Images/image_422.jpg
- Resources/Images/image_421.png
- Resources/Images/image_428.png
- Resources/Images/image_429.jpg
- Documents/1/Pages/73.fpage
- Resources/Images/image_436.png
- Resources/Images/image_435.png
- Resources/Images/image_434.jpg
- Documents/1/Pages/74.fpage
- Resources/Images/image_433.png
- Resources/Images/image_432.png
- Resources/Images/image_431.jpg
- Resources/Images/image_430.jpg
- Resources/Images/image_420.png
- Resources/Images/image_419.jpg
- Resources/Images/image_418.png
- Resources/Images/image_409.jpg
- Resources/Images/image_408.jpg
- Documents/1/Pages/69.fpage
- Resources/Images/image_407.png
- Resources/Images/image_406.jpg
- Resources/Images/image_405.jpg
- Resources/Images/image_404.jpg
- Documents/1/Pages/68.fpage
- Resources/Images/image_410.png
- Resources/Images/image_411.jpg
- Documents/1/Pages/70.fpage
- Resources/Images/image_417.jpg
- Resources/Images/image_416.jpg
- Documents/1/Pages/71.fpage
- Resources/Images/image_415.png
- Resources/Images/image_414.png
- Resources/Images/image_413.jpg
- Resources/Images/image_412.jpg
- Resources/Images/image_402.jpg
- Resources/Images/image_365.png
- Resources/Images/image_366.jpg
- Resources/Images/image_318.png
- Resources/Images/image_317.jpg
- Resources/Images/image_316.png
- Resources/Images/image_315.jpg
- Resources/Images/image_314.jpg
- Documents/1/Pages/53.fpage
- Resources/Images/image_313.png
- Resources/Images/image_312.jpg
- Resources/Images/image_319.jpg
- Resources/Images/image_320.png
- Resources/Images/image_321.jpg
- Resources/Images/image_328.png
- Resources/Images/image_327.jpg
- Documents/1/Pages/54.fpage
- Resources/Images/image_326.png
- Resources/Images/image_325.png
- Resources/Images/image_324.png
- Resources/Images/image_323.png
- Resources/Images/image_322.png
- Resources/Images/image_311.png
- Resources/Images/image_310.png
- Resources/Images/image_309.png
- Resources/Images/image_299.png
- Resources/Images/image_298.jpg
- Resources/Images/image_297.jpg
- Documents/1/Pages/51.fpage
- Resources/Images/image_296.jpg
- Resources/Images/image_295.png
- Resources/Images/image_294.jpg
- Resources/Images/image_293.jpg
- Resources/Images/image_300.png
- Documents/1/Pages/52.fpage
- Resources/Images/image_301.jpg
- Resources/Images/image_308.png
- Resources/Images/image_307.png
- Resources/Images/image_306.jpg
- Resources/Images/image_305.png
- Resources/Images/image_304.jpg
- Resources/Images/image_303.png
- Resources/Images/image_302.jpg
- Resources/Images/image_329.jpg
- Resources/Images/image_330.jpg
- Resources/Images/image_331.jpg
- Resources/Images/image_356.jpg
- Resources/Images/image_355.jpg
- Documents/1/Pages/58.fpage
- Resources/Images/image_354.png
- Resources/Images/image_353.png
- Resources/Images/image_352.jpg
- Resources/Images/image_351.jpg
- Resources/Images/image_350.jpg
- Resources/Images/image_357.png
- Resources/Images/image_358.png
- Documents/1/Pages/59.fpage
- Resources/Images/image_437.png
- Resources/Images/image_364.jpg
- Resources/Images/image_363.jpg
- Documents/1/Pages/60.fpage
- Resources/Images/image_362.png
- Resources/Images/image_361.png
- Resources/Images/image_360.jpg
- Resources/Images/image_359.jpg
- Resources/Images/image_349.jpg
- Resources/Images/image_348.jpg
- Documents/1/Pages/57.fpage
- Resources/Images/image_338.png
- Resources/Images/image_337.jpg
- Resources/Images/image_336.png
- Resources/Images/image_335.jpg
- Resources/Images/image_334.jpg
- Documents/1/Pages/55.fpage
- Resources/Images/image_333.jpg
- Resources/Images/image_332.png
- Resources/Images/image_339.png
- Resources/Images/image_340.png
- Documents/1/Pages/56.fpage
- Resources/Images/image_347.png
- Resources/Images/image_346.png
- Resources/Images/image_345.png
- Resources/Images/image_344.jpg
- Resources/Images/image_343.png
- Resources/Images/image_342.jpg
- Resources/Images/image_341.jpg
- Resources/Images/image_367.jpg
- Resources/Images/image_439.png
- Resources/Images/image_438.jpg
- Documents/1/Pages/_rels/24.fpage.rels
- Documents/1/Pages/_rels/23.fpage.rels
- Documents/1/Pages/_rels/22.fpage.rels
- Documents/1/Pages/_rels/21.fpage.rels
- Documents/1/Pages/_rels/20.fpage.rels
- Documents/1/Pages/_rels/19.fpage.rels
- Documents/1/Pages/_rels/18.fpage.rels
- Documents/1/Pages/_rels/17.fpage.rels
- Documents/1/Pages/_rels/25.fpage.rels
- Documents/1/Pages/_rels/26.fpage.rels
- Documents/1/Pages/_rels/27.fpage.rels
- Documents/1/Pages/_rels/35.fpage.rels
- Documents/1/Pages/_rels/34.fpage.rels
- Documents/1/Pages/_rels/33.fpage.rels
- Documents/1/Pages/_rels/32.fpage.rels
- Documents/1/Pages/_rels/31.fpage.rels
- Documents/1/Pages/_rels/30.fpage.rels
- Documents/1/Pages/_rels/29.fpage.rels
- Documents/1/Pages/_rels/28.fpage.rels
- Documents/1/Pages/_rels/16.fpage.rels
- Documents/1/Pages/_rels/15.fpage.rels
- Documents/1/Pages/_rels/14.fpage.rels
- Documents/1/Pages/_rels/3.fpage.rels
- Documents/1/Pages/_rels/2.fpage.rels
- Documents/1/Pages/_rels/1.fpage.rels
- Resources/114948B9-419D-5983-5F02-9434475C241C.odttf
- Resources/38F723C5-219E-2FE6-8429-B517B322F30C.odttf
- Resources/3509263C-3484-2D5F-1F2C-5846EF7C572F.odttf
- Resources/09CE45D8-3CE5-1BA8-7A78-20138E1A147E.odttf
- Resources/7788145A-197C-0014-221A-E5088A52C10D.odttf
- Documents/1/Pages/_rels/4.fpage.rels
- Documents/1/Pages/_rels/5.fpage.rels
- Documents/1/Pages/_rels/6.fpage.rels
- Documents/1/Pages/_rels/13.fpage.rels
- Documents/1/Pages/_rels/12.fpage.rels
- Documents/1/Pages/_rels/11.fpage.rels
- Documents/1/Pages/_rels/10.fpage.rels
- Documents/1/Pages/_rels/9.fpage.rels
- Documents/1/Pages/_rels/8.fpage.rels
- Documents/1/Pages/_rels/7.fpage.rels
- Documents/1/Pages/_rels/36.fpage.rels
- Documents/1/Pages/_rels/37.fpage.rels
- Documents/1/Pages/_rels/38.fpage.rels
- Documents/1/Pages/_rels/67.fpage.rels
- Documents/1/Pages/_rels/66.fpage.rels
- Documents/1/Pages/_rels/65.fpage.rels
- Documents/1/Pages/_rels/64.fpage.rels
- Documents/1/Pages/_rels/63.fpage.rels
- Documents/1/Pages/_rels/62.fpage.rels
- Documents/1/Pages/_rels/61.fpage.rels
- Documents/1/Pages/_rels/60.fpage.rels
- Documents/1/Pages/_rels/68.fpage.rels
- Documents/1/Pages/_rels/69.fpage.rels
- Documents/1/Pages/_rels/70.fpage.rels
- Documents/1/_rels/FixedDoc.fdoc.rels
- Documents/1/Pages/_rels/76.fpage.rels
- Documents/1/Pages/_rels/75.fpage.rels
- Documents/1/Pages/_rels/74.fpage.rels
- Documents/1/Pages/_rels/73.fpage.rels
- Documents/1/Pages/_rels/72.fpage.rels
- Documents/1/Pages/_rels/71.fpage.rels
- Documents/1/Pages/_rels/59.fpage.rels
- Documents/1/Pages/_rels/58.fpage.rels
- Documents/1/Pages/_rels/57.fpage.rels
- Documents/1/Pages/_rels/46.fpage.rels
- Documents/1/Pages/_rels/45.fpage.rels
- Documents/1/Pages/_rels/44.fpage.rels
- Documents/1/Pages/_rels/43.fpage.rels
- Documents/1/Pages/_rels/42.fpage.rels
- Documents/1/Pages/_rels/41.fpage.rels
- Documents/1/Pages/_rels/40.fpage.rels
- Documents/1/Pages/_rels/39.fpage.rels
- Documents/1/Pages/_rels/47.fpage.rels
- Documents/1/Pages/_rels/48.fpage.rels
- Documents/1/Pages/_rels/49.fpage.rels
- Documents/1/Pages/_rels/56.fpage.rels
- Documents/1/Pages/_rels/55.fpage.rels
- Documents/1/Pages/_rels/54.fpage.rels
- Documents/1/Pages/_rels/53.fpage.rels
- Documents/1/Pages/_rels/52.fpage.rels
- Documents/1/Pages/_rels/51.fpage.rels
- Documents/1/Pages/_rels/50.fpage.rels
- Documents/1/FixedDoc.fdoc
- Documents/1/Structure/Fragments/76.frag
- Documents/1/Structure/Fragments/75.frag
- Documents/1/Structure/Fragments/21.frag
- Documents/1/Structure/Fragments/20.frag
- Documents/1/Structure/Fragments/19.frag
- Documents/1/Structure/Fragments/18.frag
- Documents/1/Structure/Fragments/17.frag
- Documents/1/Structure/Fragments/16.frag
- Documents/1/Structure/Fragments/15.frag
- Documents/1/Structure/Fragments/14.frag
- Documents/1/Structure/Fragments/22.frag
- Documents/1/Structure/Fragments/23.frag
- Documents/1/Structure/Fragments/24.frag
- Documents/1/Structure/Fragments/32.frag
- Documents/1/Structure/Fragments/31.frag
- Documents/1/Structure/Fragments/30.frag
- Documents/1/Structure/Fragments/29.frag
- Documents/1/Structure/Fragments/28.frag
- Documents/1/Structure/Fragments/27.frag
- Documents/1/Structure/Fragments/26.frag
- Documents/1/Structure/Fragments/25.frag
- Documents/1/Structure/Fragments/13.frag
- Documents/1/Structure/Fragments/12.frag
- Documents/1/Structure/Fragments/11.frag
- Documents/1/Structure/DocStructure.struct
- Resources/Images/image_445.png
- Resources/Images/image_444.png
- Resources/Images/image_443.jpg
- Resources/Images/image_442.png
- Documents/1/Pages/76.fpage
- Resources/Images/image_441.png
- Resources/Images/image_440.jpg
- Documents/1/Structure/Fragments/1.frag
- Documents/1/Structure/Fragments/2.frag
- Documents/1/Structure/Fragments/3.frag
- Documents/1/Structure/Fragments/10.frag
- Documents/1/Structure/Fragments/9.frag
- Documents/1/Structure/Fragments/8.frag
- Documents/1/Structure/Fragments/7.frag
- Documents/1/Structure/Fragments/6.frag
- Documents/1/Structure/Fragments/5.frag
[truncated: 387 more entries]
