# Supplementary material
Source: publisher figshare collection journal article supplement (https://sage.figshare.com/ndownloader/files/20366946)
Supplement: Supplementary file 1 [file 20366946 › [Content_Types].xml]

<?xml version="1.0" encoding="UTF-8" standalone="yes"?>
<Types xmlns="http://schemas.openxmlformats.org/package/2006/content-types"><Default Extension="png" ContentType="image/png"/><Default Extension="jpeg" ContentType="image/jpeg"/><Default Extension="rels" ContentType="application/vnd.openxmlformats-package.relationships+xml"/><Default Extension="xml" ContentType="application/xml"/><Default Extension="fdseq" ContentType="application/vnd.ms-package.xps-fixeddocumentsequence+xml"/><Default Extension="fpage" ContentType="application/vnd.ms-package.xps-fixedpage+xml"/><Default Extension="struct" ContentType="application/vnd.ms-package.xps-documentstructure+xml"/><Default Extension="frag" ContentType="application/vnd.ms-package.xps-storyfragments+xml"/><Default Extension="jpg" ContentType="image/jpeg"/><Default Extension="fdoc" ContentType="application/vnd.ms-package.xps-fixeddocument+xml"/><Default Extension="odttf" ContentType="application/vnd.ms-package.obfuscated-opentype"/><Override PartName="/docProps/core.xml" ContentType="application/vnd.openxmlformats-package.core-properties+xml"/></Types>
