# Supplementary material
Source: publisher figshare collection journal article supplement (https://sage.figshare.com/ndownloader/files/20366946)
Supplement: Supplementary file 1 [file 20366946 › Documents/1/Pages/_rels/21.fpage.rels]

<?xml version="1.0" encoding="UTF-8" standalone="yes"?>
<Relationships xmlns="http://schemas.openxmlformats.org/package/2006/relationships"><Relationship Id="rId8" Type="http://schemas.microsoft.com/xps/2005/06/required-resource" Target="../../../Resources/Images/image_136.png"/><Relationship Id="rId3" Type="http://schemas.microsoft.com/xps/2005/06/required-resource" Target="../../../Resources/09CE45D8-3CE5-1BA8-7A78-20138E1A147E.odttf"/><Relationship Id="rId7" Type="http://schemas.microsoft.com/xps/2005/06/required-resource" Target="../../../Resources/3509263C-3484-2D5F-1F2C-5846EF7C572F.odttf"/><Relationship Id="rId2" Type="http://schemas.microsoft.com/xps/2005/06/required-resource" Target="../../../Resources/Images/image_133.jpg"/><Relationship Id="rId1" Type="http://schemas.microsoft.com/xps/2005/06/required-resource" Target="../../../Resources/7788145A-197C-0014-221A-E5088A52C10D.odttf"/><Relationship Id="rId6" Type="http://schemas.microsoft.com/xps/2005/06/required-resource" Target="../../../Resources/38F723C5-219E-2FE6-8429-B517B322F30C.odttf"/><Relationship Id="rId5" Type="http://schemas.microsoft.com/xps/2005/06/required-resource" Target="../../../Resources/Images/image_135.png"/><Relationship Id="rId4" Type="http://schemas.microsoft.com/xps/2005/06/required-resource" Target="../../../Resources/Images/image_134.jpg"/><Relationship Id="rId9" Type="http://schemas.microsoft.com/xps/2005/06/storyfragments" Target="../Structure/Fragments/21.frag"/></Relationships>
