# Supplementary material (part 1 of 2)
Source: publisher figshare collection journal article supplement (https://sage.figshare.com/ndownloader/files/20366946)

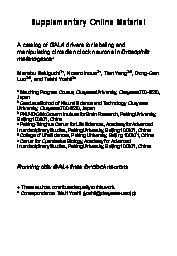

Supplement: Supplementary file 1 [file 20366946 › docProps/thumbnail.jpeg]

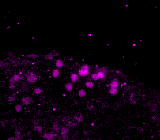

Supplement: Supplementary file 1 [file 20366946 › Resources/Images/image_391.png]

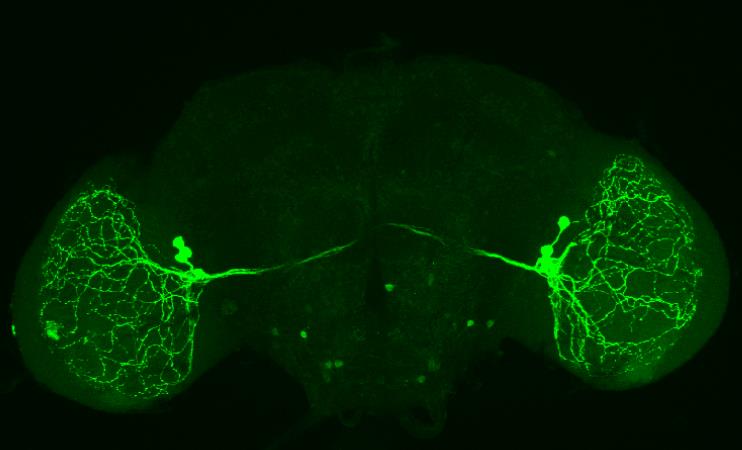

Supplement: Supplementary file 1 [file 20366946 › Resources/Images/image_392.jpg]

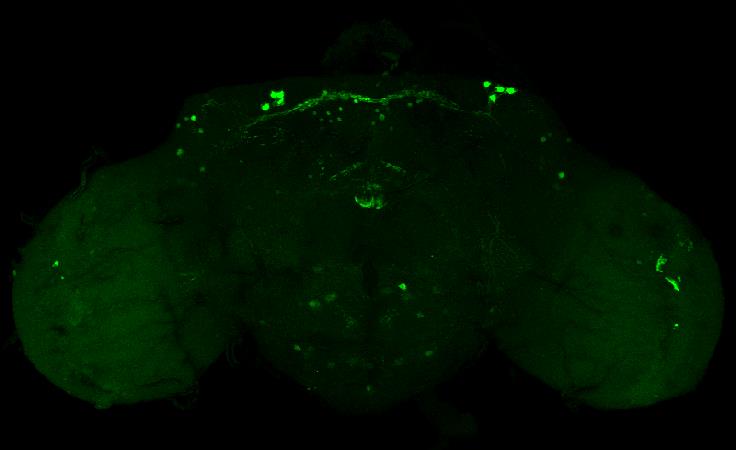

Supplement: Supplementary file 1 [file 20366946 › Resources/Images/image_388.jpg]

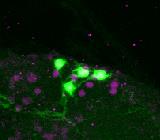

Supplement: Supplementary file 1 [file 20366946 › Resources/Images/image_389.jpg]

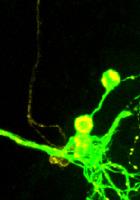

Supplement: Supplementary file 1 [file 20366946 › Resources/Images/image_393.jpg]

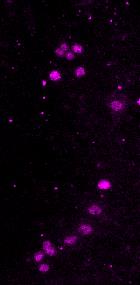

Supplement: Supplementary file 1 [file 20366946 › Resources/Images/image_387.jpg]

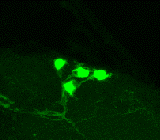

Supplement: Supplementary file 1 [file 20366946 › Resources/Images/image_390.png]

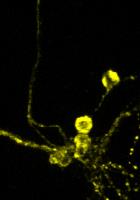

Supplement: Supplementary file 1 [file 20366946 › Resources/Images/image_395.jpg]

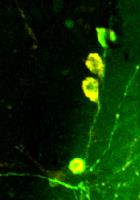

Supplement: Supplementary file 1 [file 20366946 › Resources/Images/image_400.jpg]

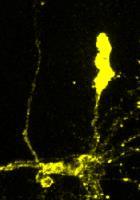

Supplement: Supplementary file 1 [file 20366946 › Resources/Images/image_399.jpg]

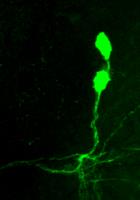

Supplement: Supplementary file 1 [file 20366946 › Resources/Images/image_398.jpg]

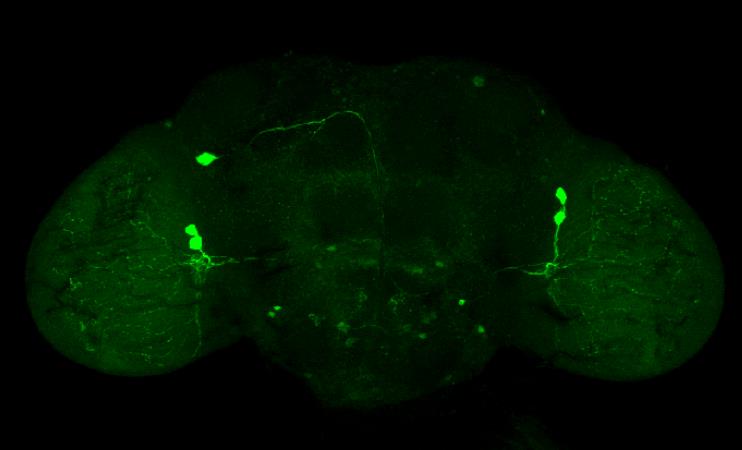

Supplement: Supplementary file 1 [file 20366946 › Resources/Images/image_397.jpg]

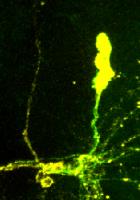

Supplement: Supplementary file 1 [file 20366946 › Resources/Images/image_396.jpg]

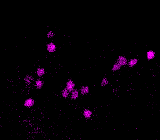

Supplement: Supplementary file 1 [file 20366946 › Resources/Images/image_386.png]

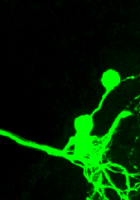

Supplement: Supplementary file 1 [file 20366946 › Resources/Images/image_394.png]

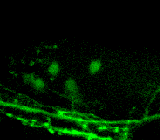

Supplement: Supplementary file 1 [file 20366946 › Resources/Images/image_383.png]

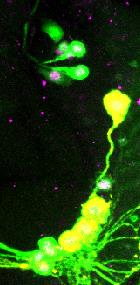

Supplement: Supplementary file 1 [file 20366946 › Resources/Images/image_384.jpg]

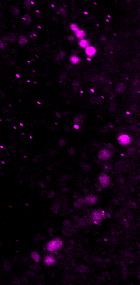

Supplement: Supplementary file 1 [file 20366946 › Resources/Images/image_375.jpg]

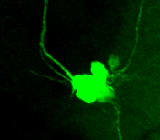

Supplement: Supplementary file 1 [file 20366946 › Resources/Images/image_374.png]

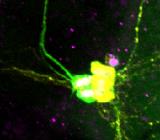

Supplement: Supplementary file 1 [file 20366946 › Resources/Images/image_373.jpg]

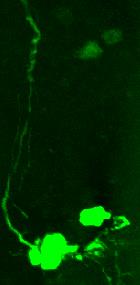

Supplement: Supplementary file 1 [file 20366946 › Resources/Images/image_372.jpg]

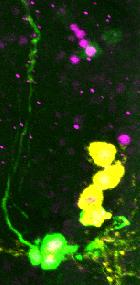

Supplement: Supplementary file 1 [file 20366946 › Resources/Images/image_371.jpg]

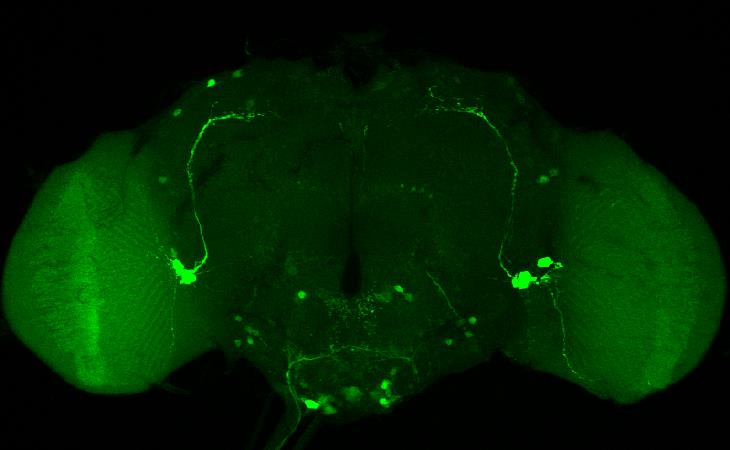

Supplement: Supplementary file 1 [file 20366946 › Resources/Images/image_370.jpg]

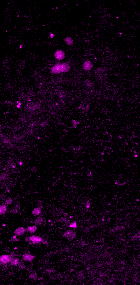

Supplement: Supplementary file 1 [file 20366946 › Resources/Images/image_369.png]

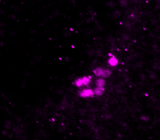

Supplement: Supplementary file 1 [file 20366946 › Resources/Images/image_376.png]

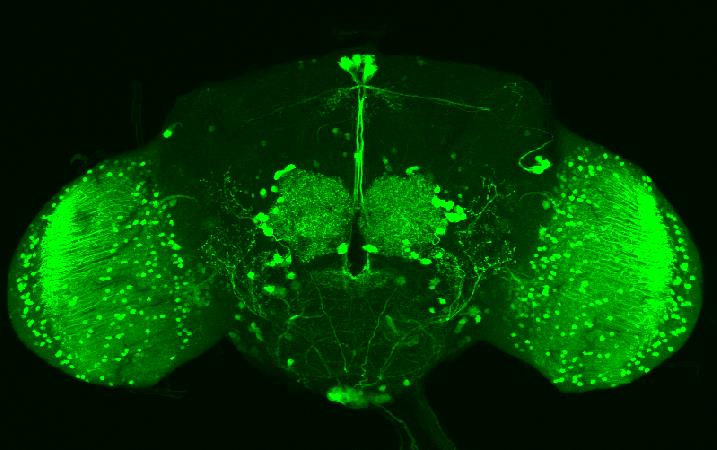

Supplement: Supplementary file 1 [file 20366946 › Resources/Images/image_377.jpg]

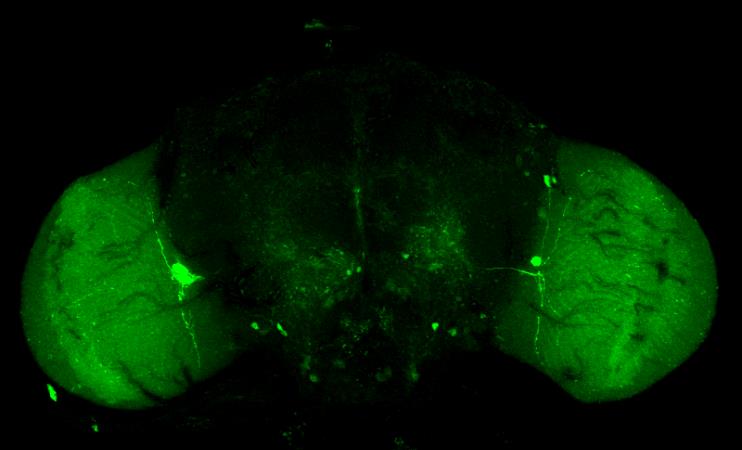

Supplement: Supplementary file 1 [file 20366946 › Resources/Images/image_401.jpg]

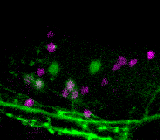

Supplement: Supplementary file 1 [file 20366946 › Resources/Images/image_382.png]

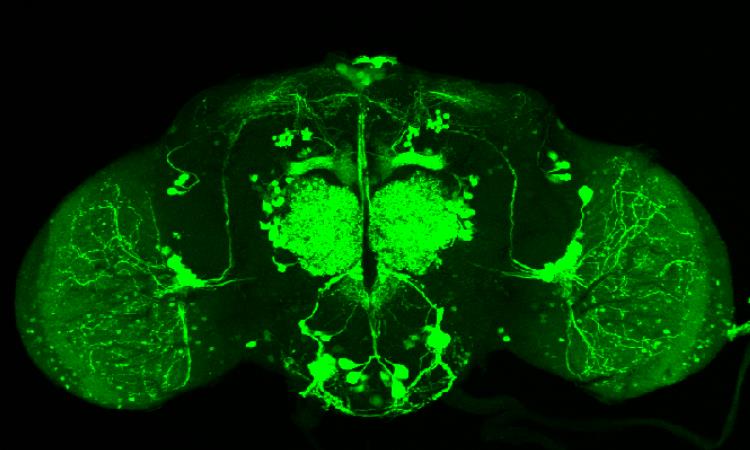

Supplement: Supplementary file 1 [file 20366946 › Resources/Images/image_381.jpg]

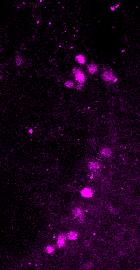

Supplement: Supplementary file 1 [file 20366946 › Resources/Images/image_380.jpg]

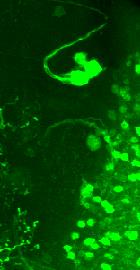

Supplement: Supplementary file 1 [file 20366946 › Resources/Images/image_379.jpg]

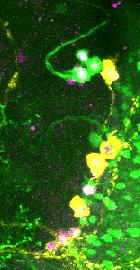

Supplement: Supplementary file 1 [file 20366946 › Resources/Images/image_378.jpg]

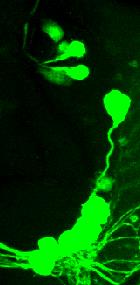

Supplement: Supplementary file 1 [file 20366946 › Resources/Images/image_385.jpg]

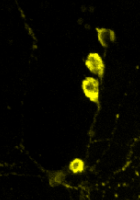

Supplement: Supplementary file 1 [file 20366946 › Resources/Images/image_403.png]

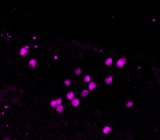

Supplement: Supplementary file 1 [file 20366946 › Resources/Images/image_368.png]

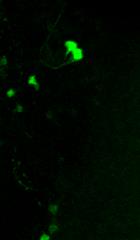

Supplement: Supplementary file 1 [file 20366946 › Resources/Images/image_427.jpg]

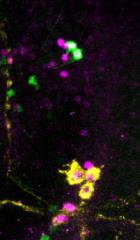

Supplement: Supplementary file 1 [file 20366946 › Resources/Images/image_426.jpg]

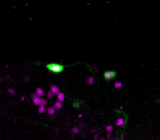

Supplement: Supplementary file 1 [file 20366946 › Resources/Images/image_425.png]

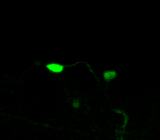

Supplement: Supplementary file 1 [file 20366946 › Resources/Images/image_424.png]

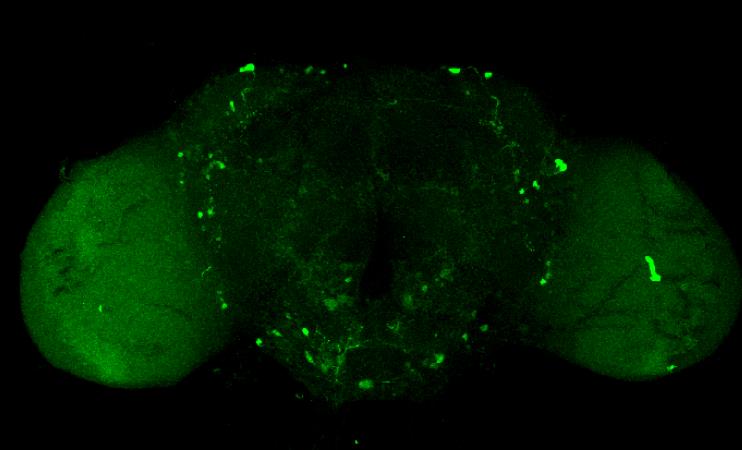

Supplement: Supplementary file 1 [file 20366946 › Resources/Images/image_423.jpg]

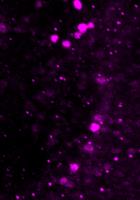

Supplement: Supplementary file 1 [file 20366946 › Resources/Images/image_422.jpg]

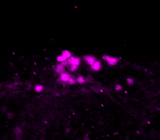

Supplement: Supplementary file 1 [file 20366946 › Resources/Images/image_421.png]

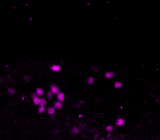

Supplement: Supplementary file 1 [file 20366946 › Resources/Images/image_428.png]

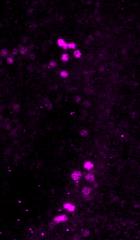

Supplement: Supplementary file 1 [file 20366946 › Resources/Images/image_429.jpg]

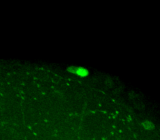

Supplement: Supplementary file 1 [file 20366946 › Resources/Images/image_436.png]

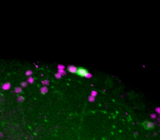

Supplement: Supplementary file 1 [file 20366946 › Resources/Images/image_435.png]

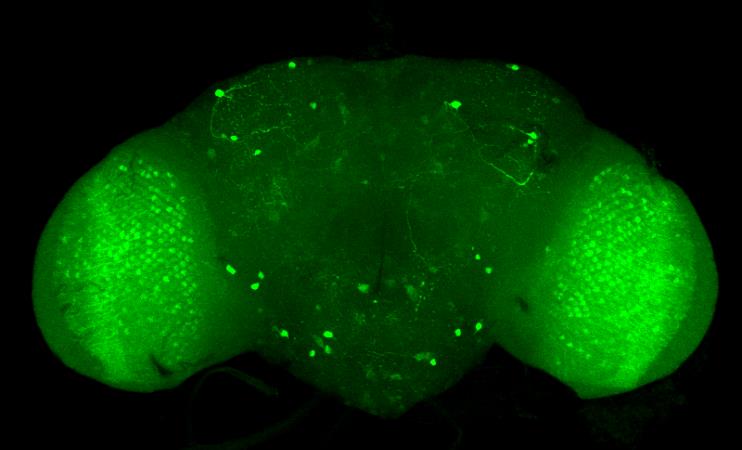

Supplement: Supplementary file 1 [file 20366946 › Resources/Images/image_434.jpg]

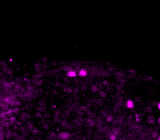

Supplement: Supplementary file 1 [file 20366946 › Resources/Images/image_433.png]

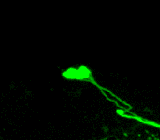

Supplement: Supplementary file 1 [file 20366946 › Resources/Images/image_432.png]

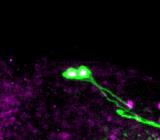

Supplement: Supplementary file 1 [file 20366946 › Resources/Images/image_431.jpg]

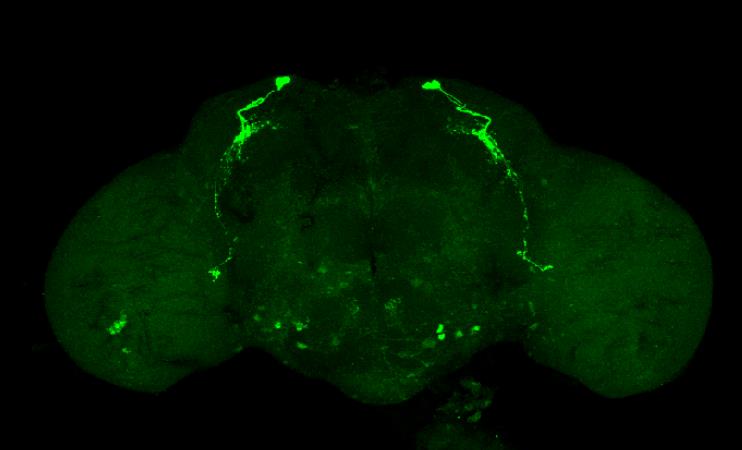

Supplement: Supplementary file 1 [file 20366946 › Resources/Images/image_430.jpg]

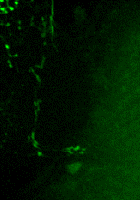

Supplement: Supplementary file 1 [file 20366946 › Resources/Images/image_420.png]

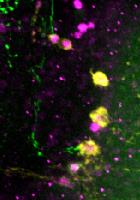

Supplement: Supplementary file 1 [file 20366946 › Resources/Images/image_419.jpg]

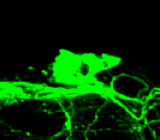

Supplement: Supplementary file 1 [file 20366946 › Resources/Images/image_418.png]

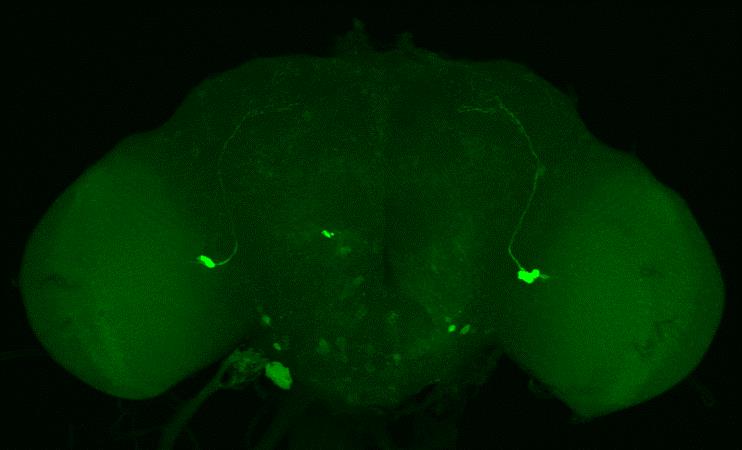

Supplement: Supplementary file 1 [file 20366946 › Resources/Images/image_409.jpg]

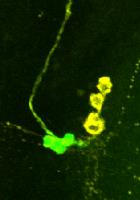

Supplement: Supplementary file 1 [file 20366946 › Resources/Images/image_408.jpg]

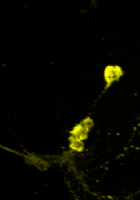

Supplement: Supplementary file 1 [file 20366946 › Resources/Images/image_407.png]

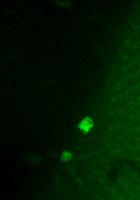

Supplement: Supplementary file 1 [file 20366946 › Resources/Images/image_406.jpg]

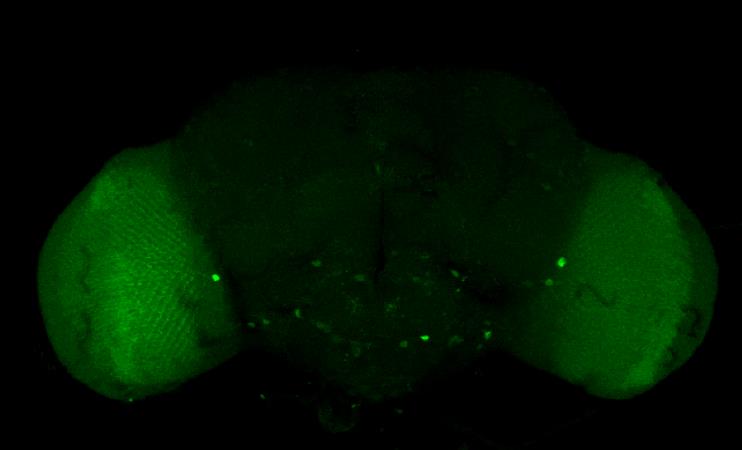

Supplement: Supplementary file 1 [file 20366946 › Resources/Images/image_405.jpg]

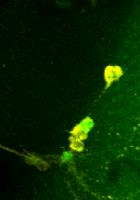

Supplement: Supplementary file 1 [file 20366946 › Resources/Images/image_404.jpg]

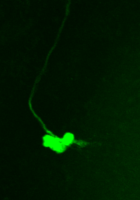

Supplement: Supplementary file 1 [file 20366946 › Resources/Images/image_410.png]

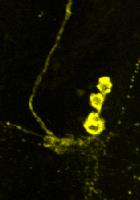

Supplement: Supplementary file 1 [file 20366946 › Resources/Images/image_411.jpg]

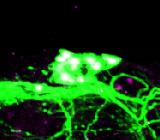

Supplement: Supplementary file 1 [file 20366946 › Resources/Images/image_417.jpg]

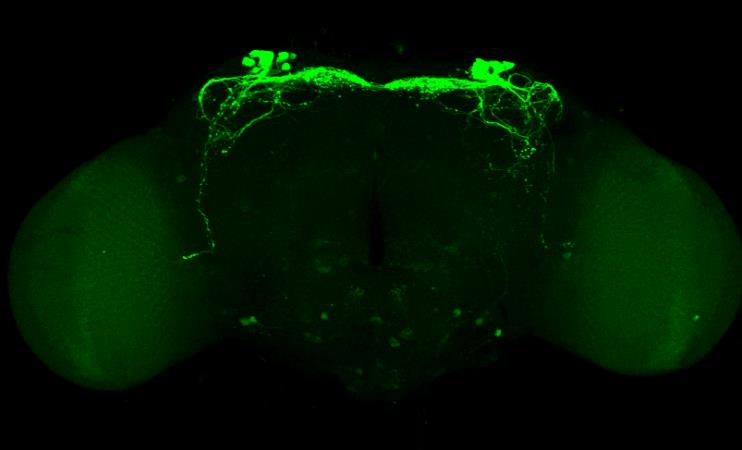

Supplement: Supplementary file 1 [file 20366946 › Resources/Images/image_416.jpg]

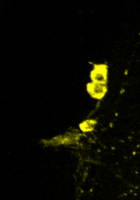

Supplement: Supplementary file 1 [file 20366946 › Resources/Images/image_415.png]

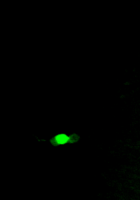

Supplement: Supplementary file 1 [file 20366946 › Resources/Images/image_414.png]

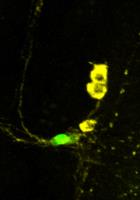

Supplement: Supplementary file 1 [file 20366946 › Resources/Images/image_413.jpg]

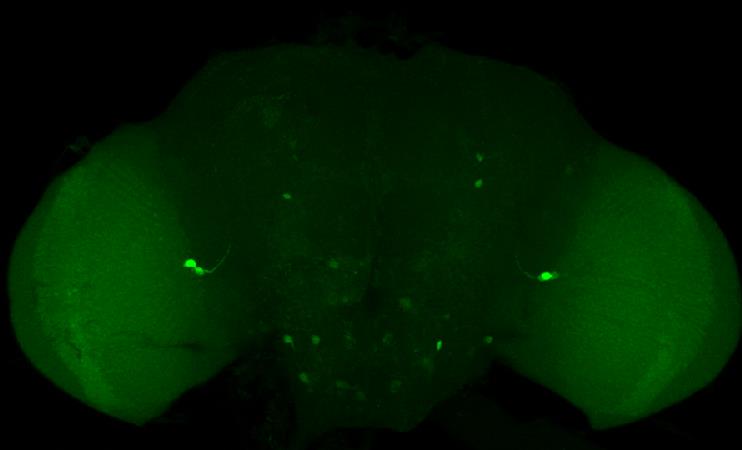

Supplement: Supplementary file 1 [file 20366946 › Resources/Images/image_412.jpg]

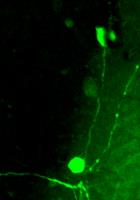

Supplement: Supplementary file 1 [file 20366946 › Resources/Images/image_402.jpg]

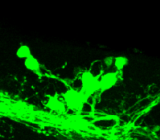

Supplement: Supplementary file 1 [file 20366946 › Resources/Images/image_365.png]

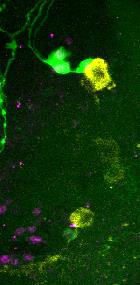

Supplement: Supplementary file 1 [file 20366946 › Resources/Images/image_366.jpg]

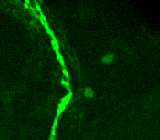

Supplement: Supplementary file 1 [file 20366946 › Resources/Images/image_318.png]

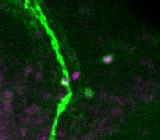

Supplement: Supplementary file 1 [file 20366946 › Resources/Images/image_317.jpg]

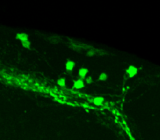

Supplement: Supplementary file 1 [file 20366946 › Resources/Images/image_316.png]

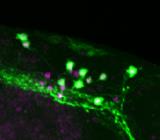

Supplement: Supplementary file 1 [file 20366946 › Resources/Images/image_315.jpg]

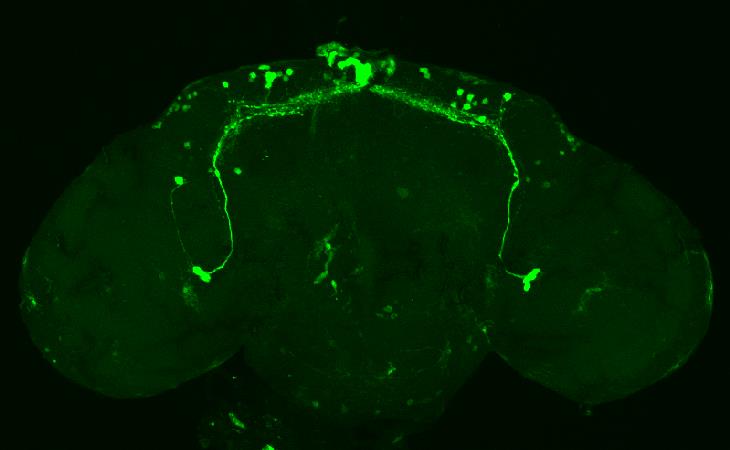

Supplement: Supplementary file 1 [file 20366946 › Resources/Images/image_314.jpg]

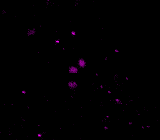

Supplement: Supplementary file 1 [file 20366946 › Resources/Images/image_313.png]

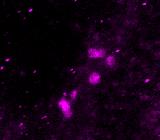

Supplement: Supplementary file 1 [file 20366946 › Resources/Images/image_312.jpg]

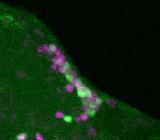

Supplement: Supplementary file 1 [file 20366946 › Resources/Images/image_319.jpg]

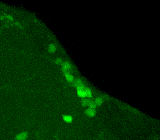

Supplement: Supplementary file 1 [file 20366946 › Resources/Images/image_320.png]

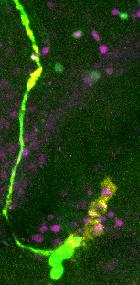

Supplement: Supplementary file 1 [file 20366946 › Resources/Images/image_321.jpg]

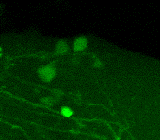

Supplement: Supplementary file 1 [file 20366946 › Resources/Images/image_328.png]

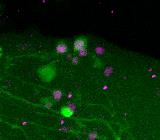

Supplement: Supplementary file 1 [file 20366946 › Resources/Images/image_327.jpg]

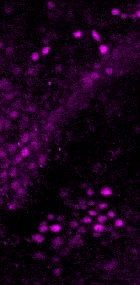

Supplement: Supplementary file 1 [file 20366946 › Resources/Images/image_326.png]

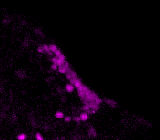

Supplement: Supplementary file 1 [file 20366946 › Resources/Images/image_325.png]

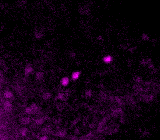

Supplement: Supplementary file 1 [file 20366946 › Resources/Images/image_324.png]

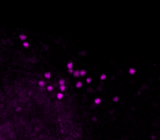

Supplement: Supplementary file 1 [file 20366946 › Resources/Images/image_323.png]

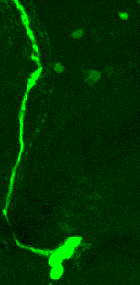

Supplement: Supplementary file 1 [file 20366946 › Resources/Images/image_322.png]

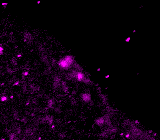

Supplement: Supplementary file 1 [file 20366946 › Resources/Images/image_311.png]

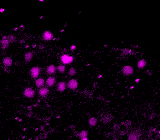

Supplement: Supplementary file 1 [file 20366946 › Resources/Images/image_310.png]

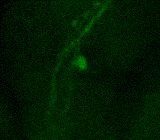

Supplement: Supplementary file 1 [file 20366946 › Resources/Images/image_309.png]

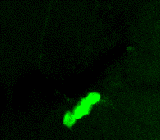

Supplement: Supplementary file 1 [file 20366946 › Resources/Images/image_299.png]

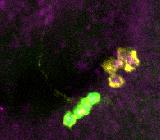

Supplement: Supplementary file 1 [file 20366946 › Resources/Images/image_298.jpg]

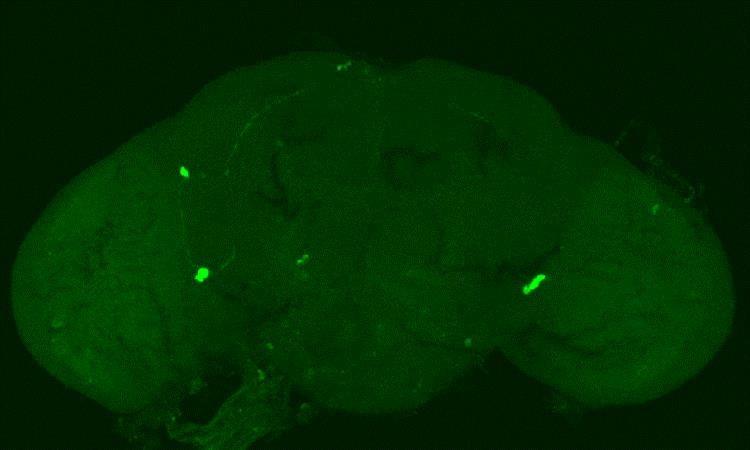

Supplement: Supplementary file 1 [file 20366946 › Resources/Images/image_297.jpg]

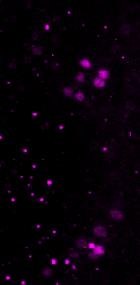

Supplement: Supplementary file 1 [file 20366946 › Resources/Images/image_296.jpg]

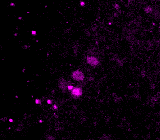

Supplement: Supplementary file 1 [file 20366946 › Resources/Images/image_295.png]

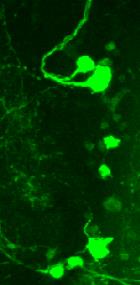

Supplement: Supplementary file 1 [file 20366946 › Resources/Images/image_294.jpg]

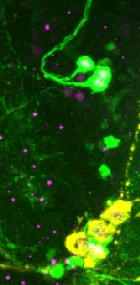

Supplement: Supplementary file 1 [file 20366946 › Resources/Images/image_293.jpg]

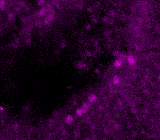

Supplement: Supplementary file 1 [file 20366946 › Resources/Images/image_300.png]
