# Supplementary material (part 2 of 2)
Source: publisher figshare collection journal article supplement (https://sage.figshare.com/ndownloader/files/20366946)

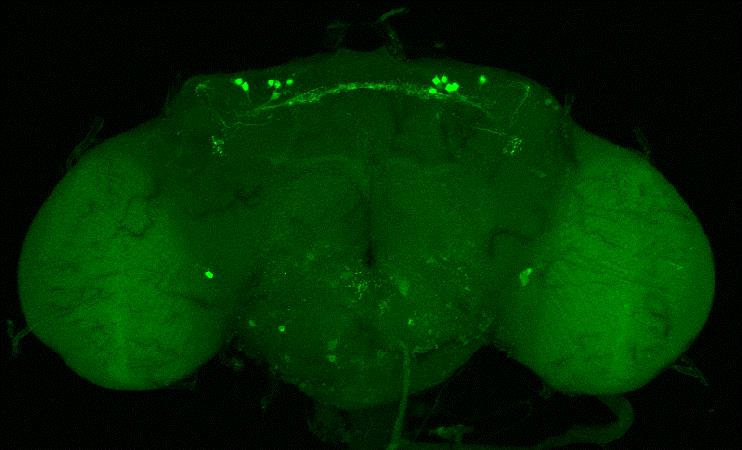

Supplement: Supplementary file 1 [file 20366946 › Resources/Images/image_301.jpg]

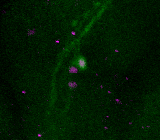

Supplement: Supplementary file 1 [file 20366946 › Resources/Images/image_308.png]

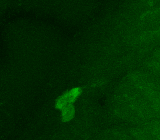

Supplement: Supplementary file 1 [file 20366946 › Resources/Images/image_307.png]

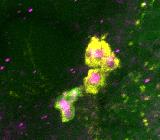

Supplement: Supplementary file 1 [file 20366946 › Resources/Images/image_306.jpg]

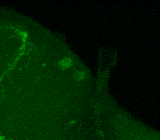

Supplement: Supplementary file 1 [file 20366946 › Resources/Images/image_305.png]

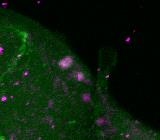

Supplement: Supplementary file 1 [file 20366946 › Resources/Images/image_304.jpg]

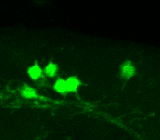

Supplement: Supplementary file 1 [file 20366946 › Resources/Images/image_303.png]

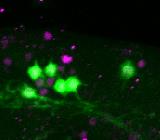

Supplement: Supplementary file 1 [file 20366946 › Resources/Images/image_302.jpg]

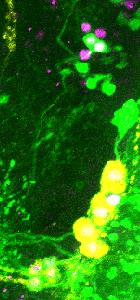

Supplement: Supplementary file 1 [file 20366946 › Resources/Images/image_329.jpg]

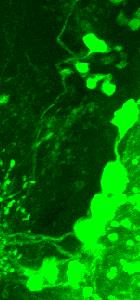

Supplement: Supplementary file 1 [file 20366946 › Resources/Images/image_330.jpg]

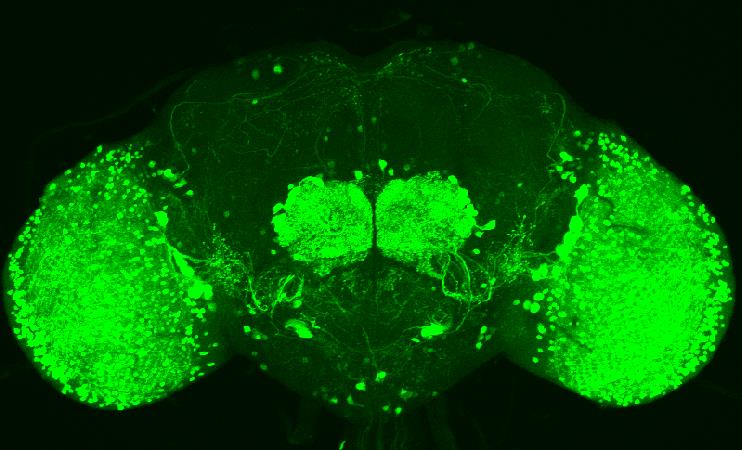

Supplement: Supplementary file 1 [file 20366946 › Resources/Images/image_331.jpg]

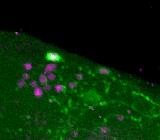

Supplement: Supplementary file 1 [file 20366946 › Resources/Images/image_356.jpg]

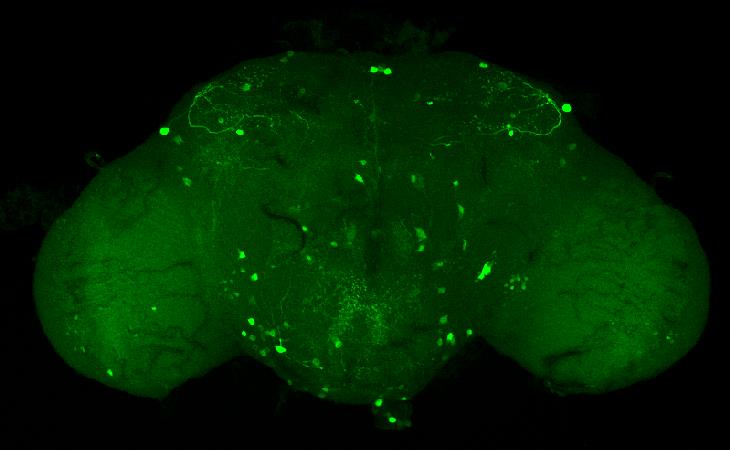

Supplement: Supplementary file 1 [file 20366946 › Resources/Images/image_355.jpg]

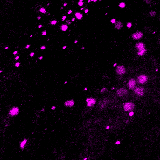

Supplement: Supplementary file 1 [file 20366946 › Resources/Images/image_354.png]

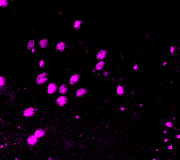

Supplement: Supplementary file 1 [file 20366946 › Resources/Images/image_353.png]

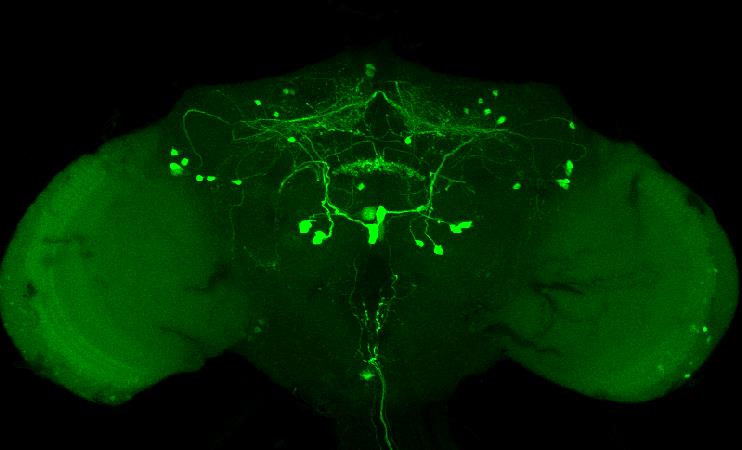

Supplement: Supplementary file 1 [file 20366946 › Resources/Images/image_352.jpg]

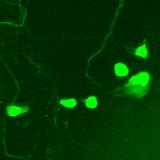

Supplement: Supplementary file 1 [file 20366946 › Resources/Images/image_351.jpg]

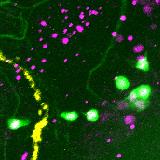

Supplement: Supplementary file 1 [file 20366946 › Resources/Images/image_350.jpg]

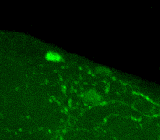

Supplement: Supplementary file 1 [file 20366946 › Resources/Images/image_357.png]

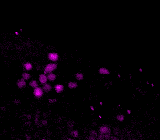

Supplement: Supplementary file 1 [file 20366946 › Resources/Images/image_358.png]

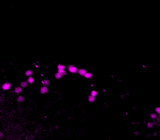

Supplement: Supplementary file 1 [file 20366946 › Resources/Images/image_437.png]

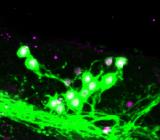

Supplement: Supplementary file 1 [file 20366946 › Resources/Images/image_364.jpg]

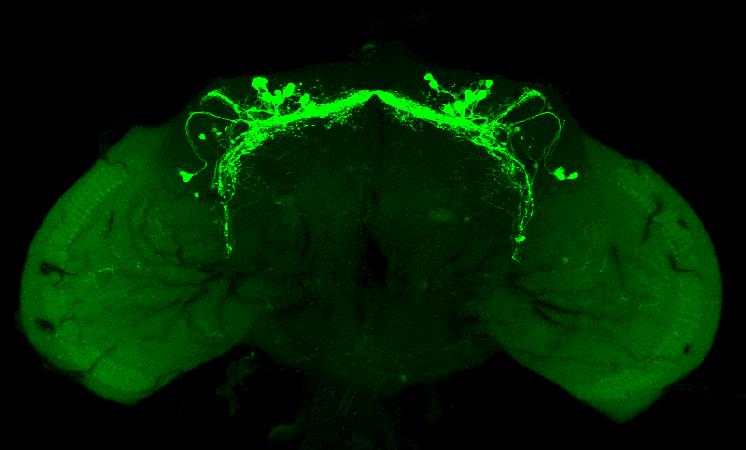

Supplement: Supplementary file 1 [file 20366946 › Resources/Images/image_363.jpg]

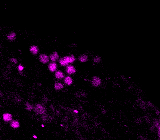

Supplement: Supplementary file 1 [file 20366946 › Resources/Images/image_362.png]

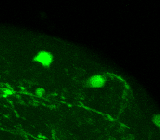

Supplement: Supplementary file 1 [file 20366946 › Resources/Images/image_361.png]

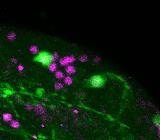

Supplement: Supplementary file 1 [file 20366946 › Resources/Images/image_360.jpg]

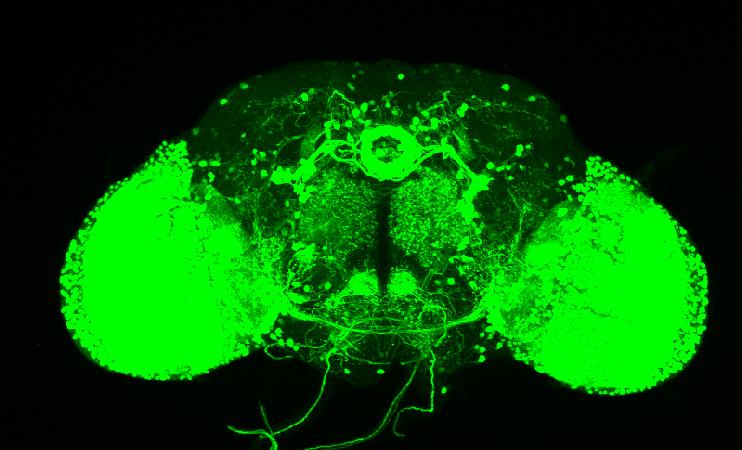

Supplement: Supplementary file 1 [file 20366946 › Resources/Images/image_359.jpg]

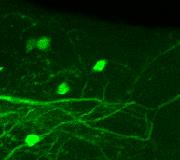

Supplement: Supplementary file 1 [file 20366946 › Resources/Images/image_349.jpg]

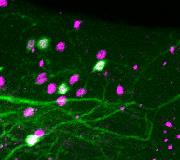

Supplement: Supplementary file 1 [file 20366946 › Resources/Images/image_348.jpg]

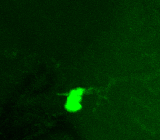

Supplement: Supplementary file 1 [file 20366946 › Resources/Images/image_338.png]

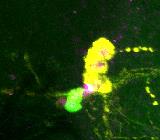

Supplement: Supplementary file 1 [file 20366946 › Resources/Images/image_337.jpg]

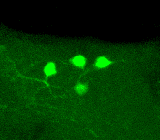

Supplement: Supplementary file 1 [file 20366946 › Resources/Images/image_336.png]

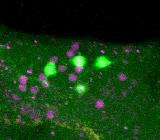

Supplement: Supplementary file 1 [file 20366946 › Resources/Images/image_335.jpg]

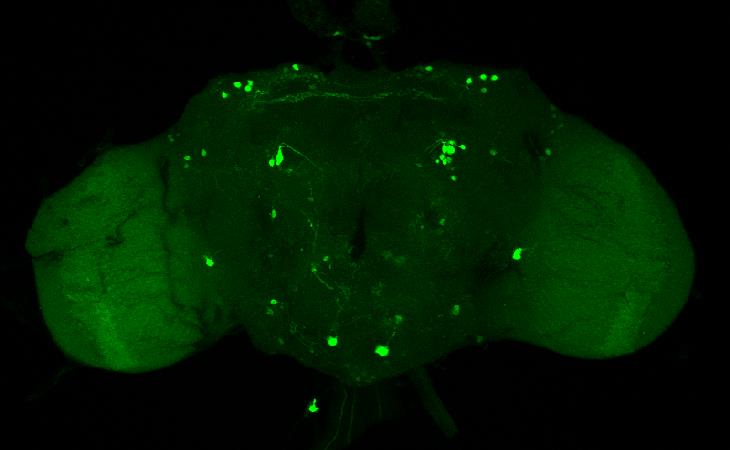

Supplement: Supplementary file 1 [file 20366946 › Resources/Images/image_334.jpg]

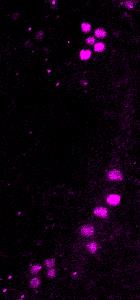

Supplement: Supplementary file 1 [file 20366946 › Resources/Images/image_333.jpg]

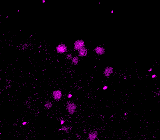

Supplement: Supplementary file 1 [file 20366946 › Resources/Images/image_332.png]

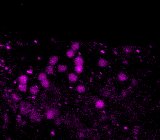

Supplement: Supplementary file 1 [file 20366946 › Resources/Images/image_339.png]

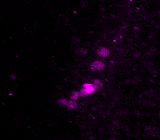

Supplement: Supplementary file 1 [file 20366946 › Resources/Images/image_340.png]

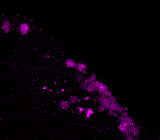

Supplement: Supplementary file 1 [file 20366946 › Resources/Images/image_347.png]

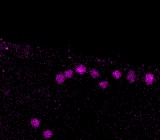

Supplement: Supplementary file 1 [file 20366946 › Resources/Images/image_346.png]

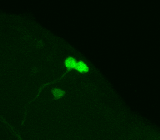

Supplement: Supplementary file 1 [file 20366946 › Resources/Images/image_345.png]

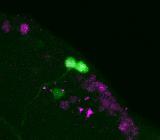

Supplement: Supplementary file 1 [file 20366946 › Resources/Images/image_344.jpg]

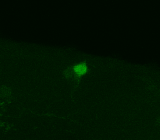

Supplement: Supplementary file 1 [file 20366946 › Resources/Images/image_343.png]

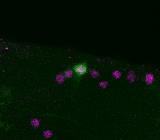

Supplement: Supplementary file 1 [file 20366946 › Resources/Images/image_342.jpg]

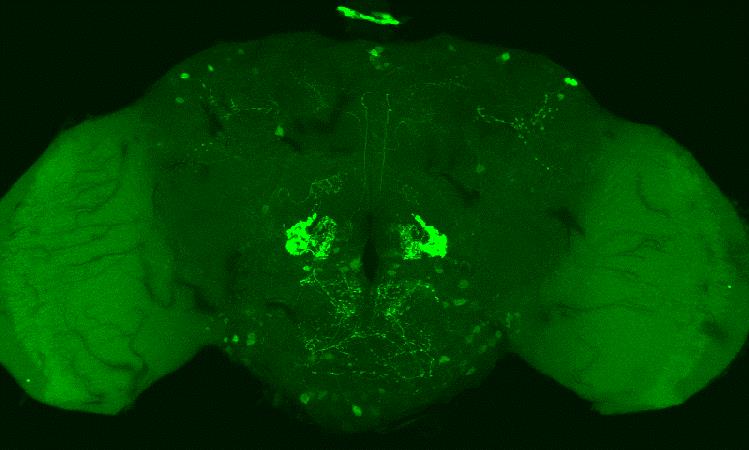

Supplement: Supplementary file 1 [file 20366946 › Resources/Images/image_341.jpg]

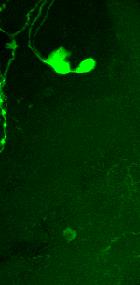

Supplement: Supplementary file 1 [file 20366946 › Resources/Images/image_367.jpg]

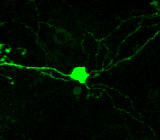

Supplement: Supplementary file 1 [file 20366946 › Resources/Images/image_439.png]

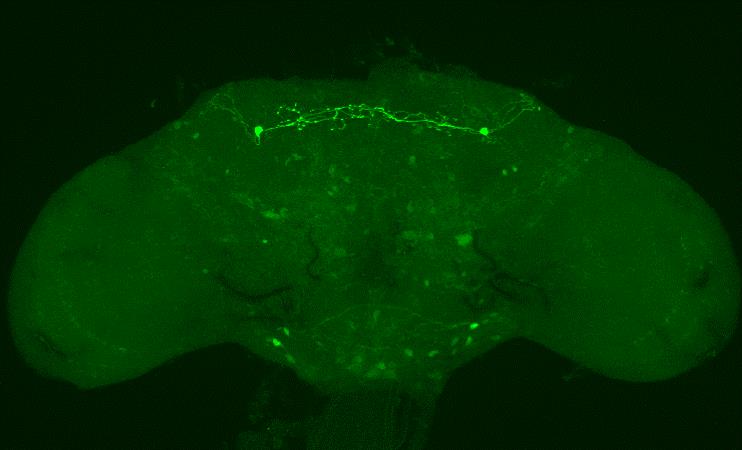

Supplement: Supplementary file 1 [file 20366946 › Resources/Images/image_438.jpg]
